# Supplementary material
Source: PubMed Central journal article supplement (PMC9798524)

**Supplementary Figure 1.** All patients undergoing confirmatory MRI-Biopsy (consisting of both a targeted biopsy [TB] and zonal systematic biopsy [SB]). Bar graph demonstrates among confirmatory MRI-biopsies showing cancer, what proportion had only positive SB cores, only positive TB cores, or had both positive SB and TB cores. The pie chart demonstrates among the cases with positive SB and TB cores, what fraction had a higher Grade Group (GG) in the SB cores, in the TB cores, or that had the same GG in the SB and TB cores.

**Supplementary Figure 2.** Confirmatory MRI-biopsy grade group based on MRI score (3-5) for patients undergoing MRI (A) prior to matching and (B) after matching. GG=grade group

Supplementary table 1. Baseline characteristics prior to matching

| Variable                            |                                               | Systematic confirmatory biopsy (n=691) | MRI confirmatory biopsy* (n=335) | p-value |
|-------------------------------------|-----------------------------------------------|----------------------------------------|----------------------------------|---------|
| Clinical Characteristics            | Median age, years (IQR)                       | 64 (58-70)                             | 64 (58-68)                       | 0.3     |
|                                     | Race, n (%)                                   |                                        |                                  | 0.2     |
|                                     | White                                         | 571 (82.6)                             | 260 (77.6)                       |         |
|                                     | Black                                         | 54 (7.8)                               | 33 (9.9)                         |         |
|                                     | Other                                         | 66 (9.6)                               | 42 (12.5)                        |         |
|                                     | Clinical T stage, n (%)                       |                                        |                                  | <0.001  |
|                                     | T1-T2a                                        | 681 (98.6)                             | 310 (92.5)                       |         |
|                                     | T2b-T2c                                       | 8 (1.2)                                | 7 (2.1)                          |         |
|                                     | Unknown                                       | 2 (0.3)                                | 18 (5.4)                         |         |
|                                     | Median PSA prior to biopsy, ng/mL (IQR)       | 4.1 (2.7-5.8)                          | 5.7 (4.3-8)                      | <0.001  |
|                                     | Median prostate volume, cm <sup>3</sup> (IQR) | 38.1 (28.5-50.7)                       | 41 (32-55)                       | 0.004   |
|                                     | Median PSA density, (IQR)                     | 0.1 (0.06-0.15)                        | 0.14 (0.9-0.2)                   | <0.001  |
| Initial Biopsy Characteristics      | Median number of cores, (IQR)                 | 12 (12-12)                             | 12 (12-12)                       | 0.02    |
|                                     | Median total tumor length, mm (IQR)           | 1.5 (0.5-3)                            | 4 (2-7)                          | <0.001  |
|                                     | Median maximum single core length, mm (IQR)   | 1 (0.5-2.5)                            | 2.5 (1-4)                        | <0.001  |
|                                     | Median number positive cores, (IQR)           | 1 (1-2)                                | 2 (1-3)                          | <0.001  |
|                                     | Grade Group, n (%)                            |                                        |                                  | 0.001   |
|                                     | 1                                             | 582 (84.2)                             | 252 (74.22)                      |         |
|                                     | 2                                             | 96 (13.9)                              | 77 (23.0)                        |         |
|                                     | 3                                             | 13 (1.9)                               | 5 (1.5)                          |         |
|                                     | 4-5                                           | 0                                      | 1 (0.3)                          |         |
|                                     | Risk Group, n (%)                             |                                        |                                  | <0.001  |
|                                     | Low                                           | 549 (79.5)                             | 215 (64.2)                       |         |
|                                     | Intermediate - Favorable                      | 122 (18.7)                             | 95 (28.4)                        |         |
| Intermediate - Unfavorable          | 17 (2.5)                                      | 15 (4.5)                               |                                  |         |
| High                                | 0                                             | 1 (0.3)                                |                                  |         |
| Unknown                             | 3 (0.4)                                       | 9 (2.7)                                |                                  |         |
| Confirmatory Biopsy Characteristics | Median number of cores, (IQR)                 | 11 (11-11)                             | 13 (12-14)                       | <0.001  |
|                                     | Median total tumor length, mm (IQR)           | 3 (1.5-7)                              | 13 (4.5-22)                      | <0.001  |
|                                     | Median maximum single core length, mm (IQR)   | 2 (1-4)                                | 6 (3-9)                          | <0.001  |
|                                     | Median number positive cores, (IQR)           | 2 (1-3)                                | 3 (1-5)                          | <0.001  |
|                                     | Grade Group, n (%)                            |                                        |                                  | <0.001  |
|                                     | Benign                                        | 324 (46.9)                             | 36 (10.8)                        |         |
|                                     | 1                                             | 208 (30.1)                             | 98 (29.3)                        |         |
|                                     | 2                                             | 123 (17.8)                             | 133 (39.7)                       |         |
|                                     | 3                                             | 27 (3.9)                               | 42 (12.5)                        |         |
|                                     | 4-5                                           | 9 (1.3)                                | 26 (7.8)                         |         |
|                                     | Risk Group (excluding benign biopsies), n (%) |                                        |                                  | <0.001  |
|                                     | Low                                           | 195 (53.1)                             | 93 (31.1)                        |         |
|                                     | Intermediate - Favorable                      | 129 (35.2)                             | 117 (39.1)                       |         |
|                                     | Intermediate - Unfavorable                    | 34 (9.3)                               | 58 (19.4)                        |         |
| High                                | 9 (2.5)                                       | 21 (7)                                 |                                  |         |
| Unknown                             | 0                                             | 10 (3.3)                               |                                  |         |
| Risk Group Change, n (%)            |                                               |                                        | <0.001                           |         |
| Increase                            | 103 (14.9)                                    | 149 (44.5)                             |                                  |         |

|                             |            |            |
|-----------------------------|------------|------------|
| Decrease                    | 347 (50.2) | 56 (16.7)  |
| Equal to initial risk group | 238 (34.4) | 120 (35.8) |

---

IQR = interquartile range

\*MRI-biopsy consisted of MRI-targeted biopsies and systematic biopsies

Supplementary Table 2. Multivariable logistic regression for upgrading using total cohort.

| <b><i>Any upgrading</i></b>                     | <b>OR</b> | <b>95% CI</b> | <b>p-value</b>   |
|-------------------------------------------------|-----------|---------------|------------------|
| Confirmatory Biopsy cohort                      |           |               |                  |
| Systematic biopsy                               | Ref       |               |                  |
| MRI-biopsy                                      | 4.56      | 3.10-6.70     | <b>&lt;0.001</b> |
| Age                                             | 1.04      | 1.02-1.06     | <b>0.001</b>     |
| PSA density                                     | 2.56      | 1.81-3.62     | <b>&lt;0.001</b> |
| Initial biopsy GG                               |           |               |                  |
| GG1                                             | Ref       |               |                  |
| GG2                                             | 0.24      | 0.14-0.40     | <b>&lt;0.001</b> |
| GG3                                             | 0.05      | 0.006-0.42    | <b>0.006</b>     |
| Initial PSA                                     | 0.98      | 0.95-1.05     | 0.9              |
| Number of initial biopsy positive cores         | 1.00      | 0.87-1.15     | 0.99             |
| Initial maximum single core tumor length        | 1.07      | 0.98-1.18     | 0.2              |
| Confirmatory biopsy total number of cores       | 0.98      | 0.91-1.06     | 0.7              |
| <b><i>Grade increase from GG1 to ≥GG2</i></b>   | <b>OR</b> | <b>95% CI</b> | <b>p-value</b>   |
| Confirmatory Biopsy cohort                      |           |               |                  |
| Systematic biopsy                               | Ref       |               |                  |
| MRI-biopsy                                      | 2.98      | 1.85-4.78     | <b>&lt;0.001</b> |
| Age                                             | 1.04      | 1.02-1.07     | <b>0.002</b>     |
| PSA density                                     | 2.59      | 1.67-4.01     | <b>&lt;0.001</b> |
| Initial PSA                                     | 0.99      | 0.92-1.07     | 0.8              |
| Number of initial biopsy positive cores         | 0.90      | 0.74-1.08     | 0.3              |
| Initial maximum single core tumor length        | 1.07      | 0.95-1.21     | 0.3              |
| Confirmatory biopsy total number of cores       | 0.97      | 0.88-1.07     | 0.5              |
| <b><i>Grade increase from GG1 to ≥GG3</i></b>   | <b>OR</b> | <b>95% CI</b> | <b>p-value</b>   |
| Confirmatory Biopsy cohort                      |           |               |                  |
| Systematic biopsy                               | Ref       |               |                  |
| MRI-biopsy                                      | 4.52      | 2.42-8.43     | <b>&lt;0.001</b> |
| Age                                             | 1.08      | 1.04-1.12     | <b>&lt;0.001</b> |
| PSA density                                     | 4.21      | 2.63-6.76     | <b>&lt;0.001</b> |
| Confirmatory biopsy total number of cores       | 0.98      | 0.89-1.09     | 0.7              |
| <b><i>Grade increase from GG1-2 to ≥GG3</i></b> | <b>OR</b> | <b>95% CI</b> | <b>p-value</b>   |
| Confirmatory Biopsy cohort                      |           |               |                  |
| Systematic biopsy                               | Ref       |               |                  |
| MRI-biopsy                                      | 4.82      | 2.78-8.35     | <b>&lt;0.001</b> |
| Age                                             | 1.08      | 1.04-1.11     | <b>&lt;0.001</b> |
| PSA density                                     | 3.86      | 2.29-6.50     | <b>&lt;0.001</b> |
| Initial PSA                                     | 0.98      | 0.93-1.03     | 0.4              |
| Number of initial biopsy positive cores         | 0.93      | 0.76-1.13     | 0.5              |
| Initial maximum single core tumor length        | 0.93      | 0.81-1.07     | 0.3              |
| Confirmatory biopsy total number of cores       | 0.99      | 0.91-1.08     | 0.9              |

GG=grade group, OR=odds ratio, CI = confidence interval

\*MRI-biopsy consisted of MRI-targeted biopsies and systematic biopsies

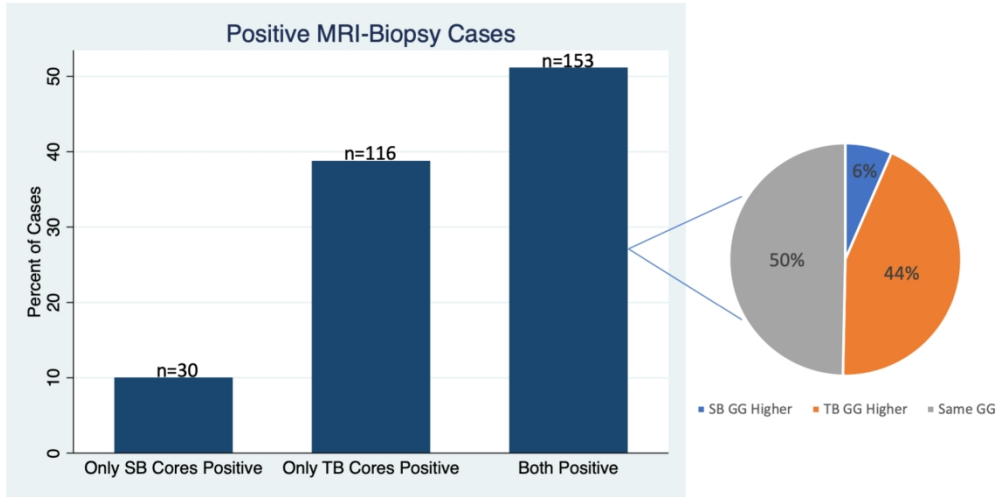

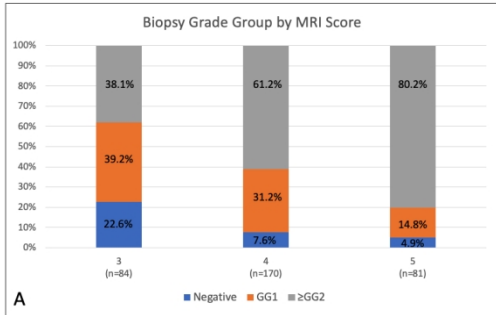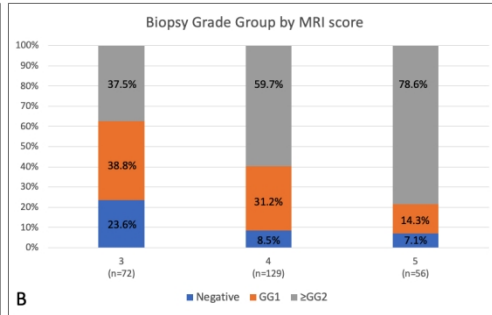

Supplement: NIHMS1856583-supplement-1.pdf [file NIHMS1856583-supplement-1.pdf]
